# Supplementary material for: A self-phosphorized carbon-based monolithic chainmail electrode for high-current-density and durable alkaline water splitting
Source: Royal Society of Chemistry journal article supplement (doi:10.1039/d3se01486j), 2023-12-06
Supplement: d3se01486j1.pdf [file d3se01486j1.pdf]

**Electronic Supplementary Information for**

**A self-phosphorized carbon-based monolithic chainmail**

**electrode for high-current-density and durable alkaline**

**water splitting**

Shixiong Min,<sup>\*a,b,c</sup> Zhe Meng,<sup>a,b,c</sup> Yaoyao Zhao,<sup>a,b,c</sup> Wenjing Li,<sup>a,b,c</sup> Zhengguo  
Zhang,<sup>a,b,c</sup> and Fang Wang<sup>a,b,c</sup>

<sup>a</sup> *School of Chemistry and Chemical Engineering, North Minzu University, Yinchuan, 750021, P. R. China. E-mail: [sxmin@nun.edu.cn](mailto:sxmin@nun.edu.cn)*

<sup>b</sup> *Ningxia Key Laboratory of Solar Chemical Conversion Technology, North Minzu University, Yinchuan 750021, P. R. China.*

<sup>c</sup> *Key Laboratory of Chemical Engineering and Technology, State Ethnic Affairs Commission, North Minzu University, Yinchuan, 750021, P. R. China.*

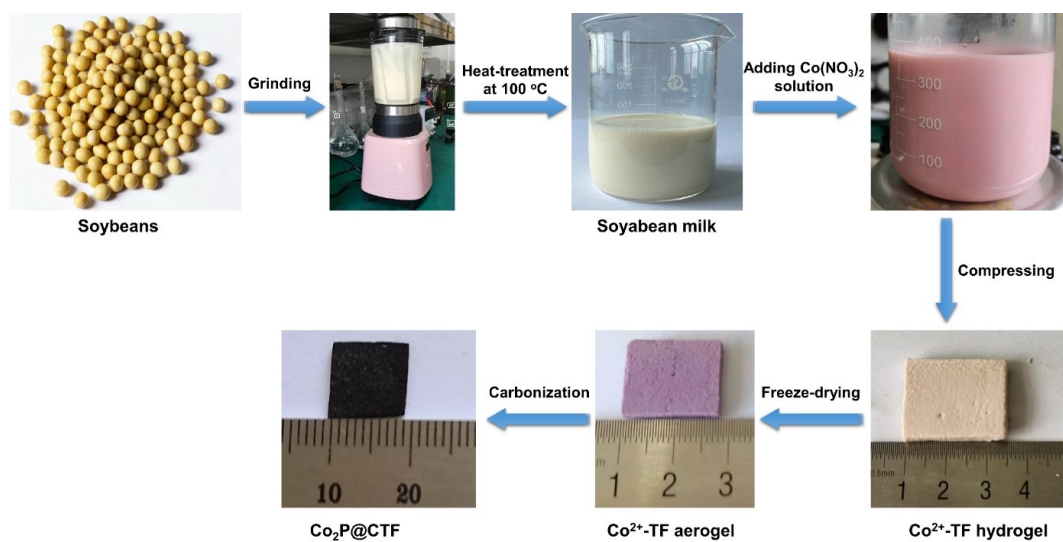

**Fig. S1** Schematics of preparation of Co<sub>2</sub>P@CTF monolithic chainmail electrode.

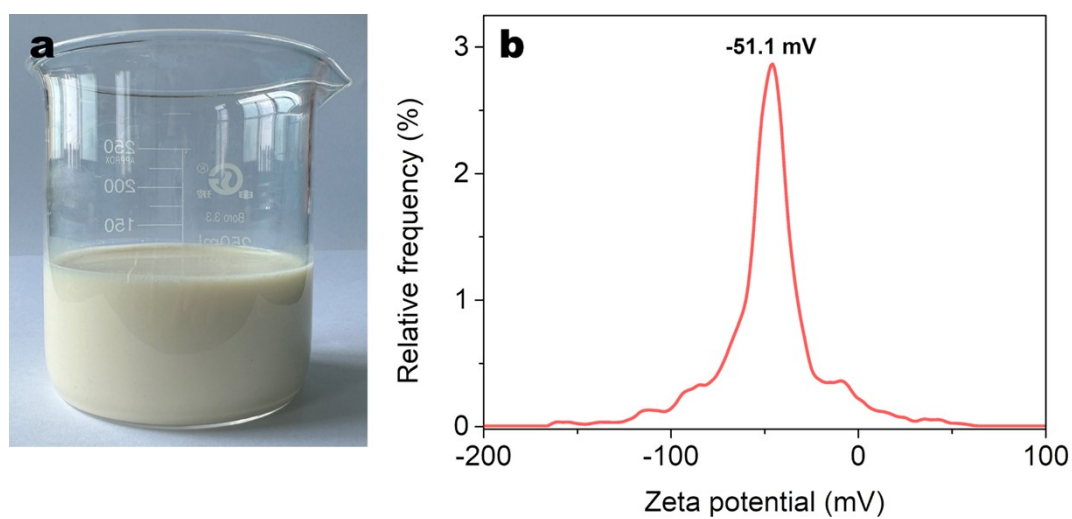

**Fig. S2** (a) Photograph of denatured soybean protein suspension and (b) the corresponding Zeta potential.

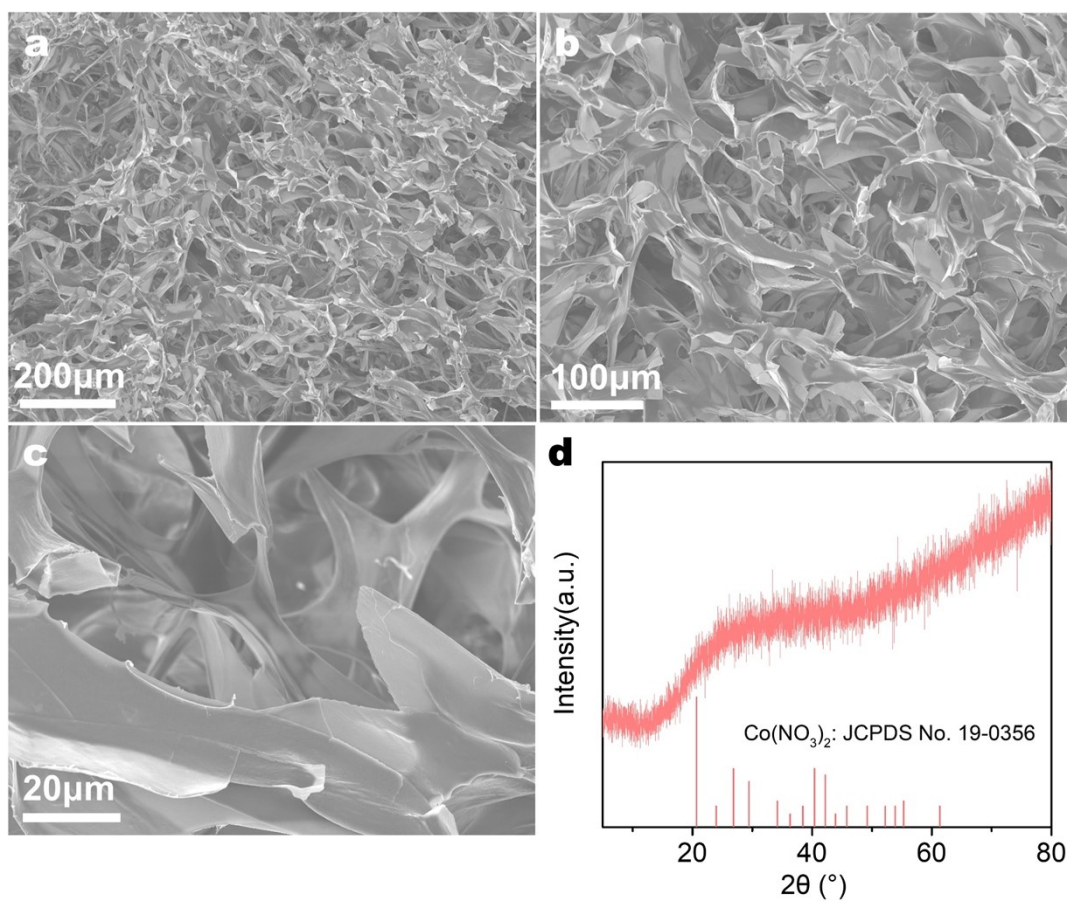

**Fig. S3** (a-c) SEM images and (d) XRD pattern of  $\text{Co}^{2+}$ -TF aerogel.

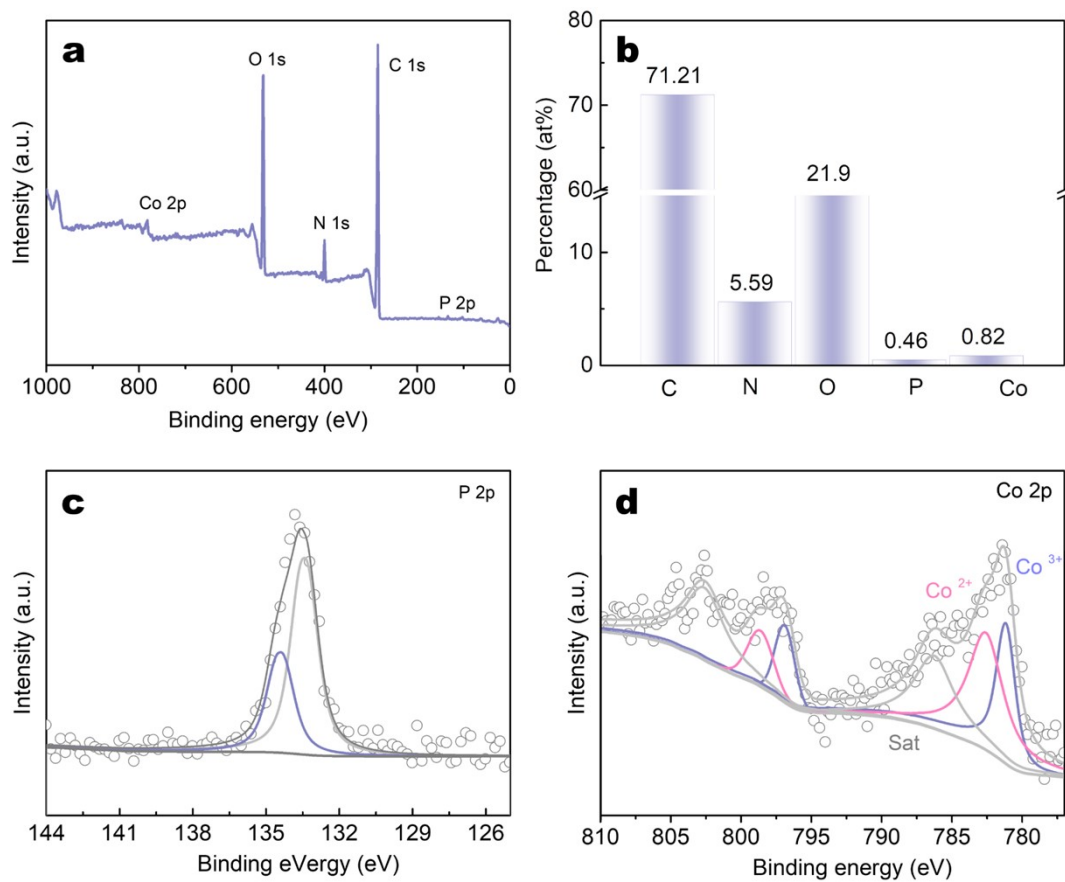

**Fig. S4** (a) XPS survey spectrum of Co<sup>2+</sup>-TF aerogel. (b) the contents of C, N, O, P and Co elements of Co<sup>2+</sup>-TF aerogel. (c) P 2p and (d) Co 2p XPS spectra of Co<sup>2+</sup>-TF aerogel.

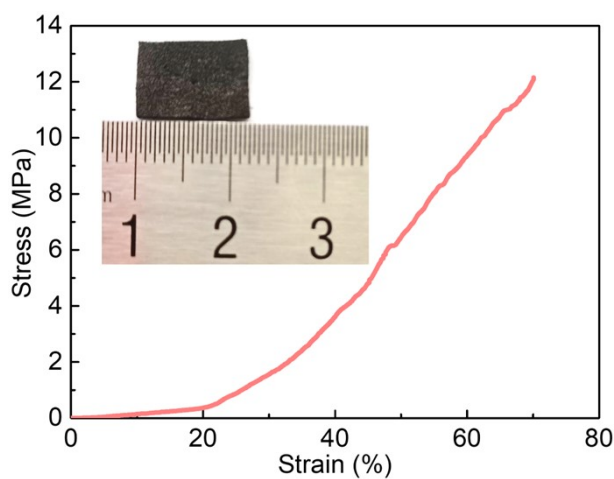

**Fig. S5** Compressive-strain curve of Co<sub>2</sub>P@CTF.

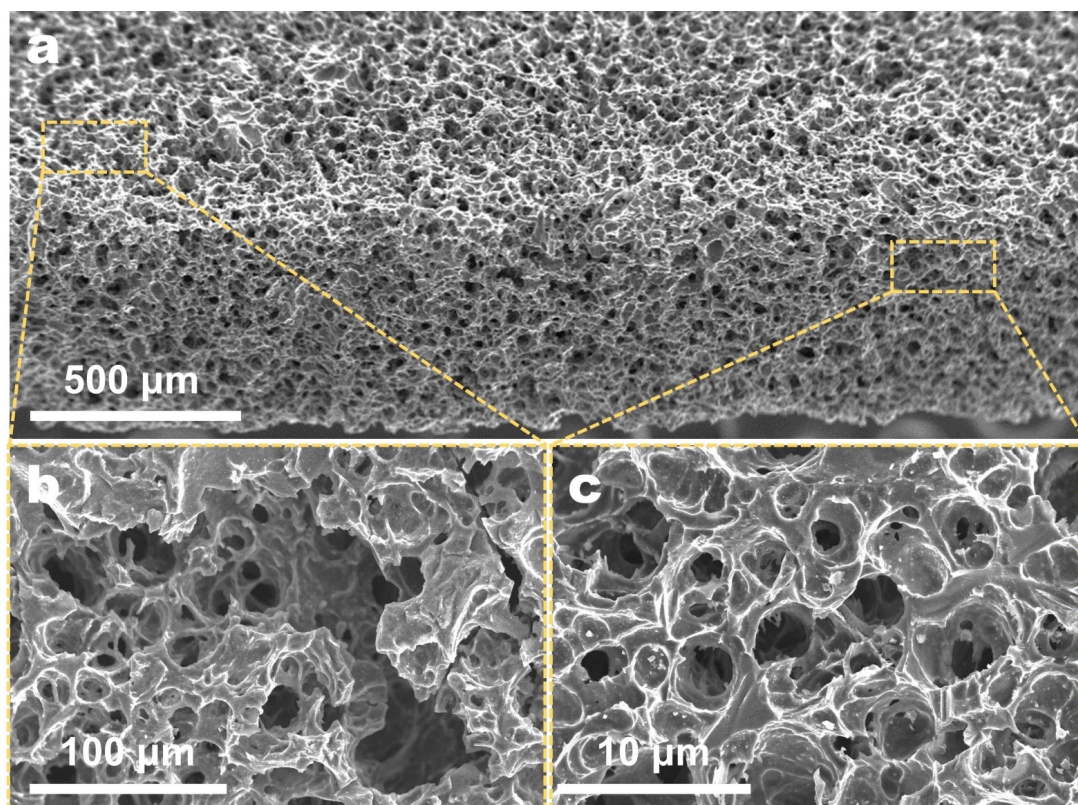

**Fig. S6** SEM images of CTF electrode.

**Table S1** ICP-OES analysis of Co<sub>2</sub>P@CTF.

| Element | Content (wt %) | Co/P<br>ratio |
|---------|----------------|---------------|
| Co      | 0.75           | 2.2:1         |
| P       | 0.18           |               |



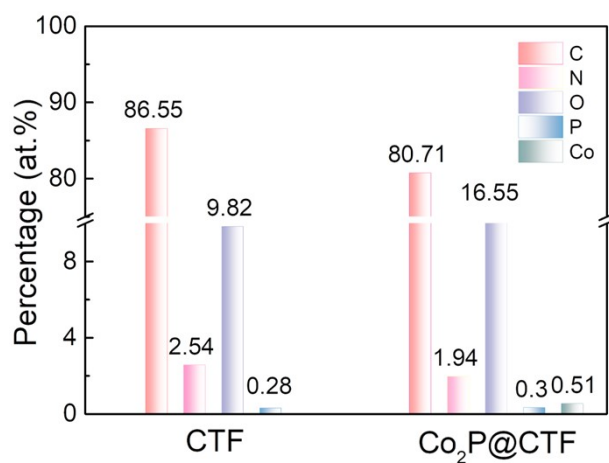

**Fig. S7** The contents of C, N, O, P, and Co elements in CTF and Co<sub>2</sub>P@CTF.

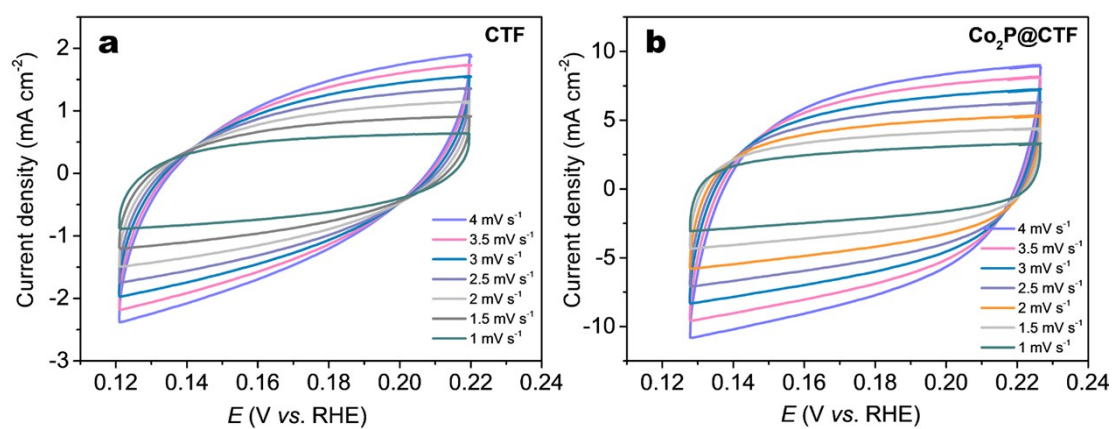

**Fig. S8** CV curves of (a) CTF and (b) Co<sub>2</sub>P@CTF electrode measured at the nonfaradaic potential region of 0.12 to 0.22 V vs. RHE over the scan rate from 1 to 4 mV s<sup>-1</sup>.

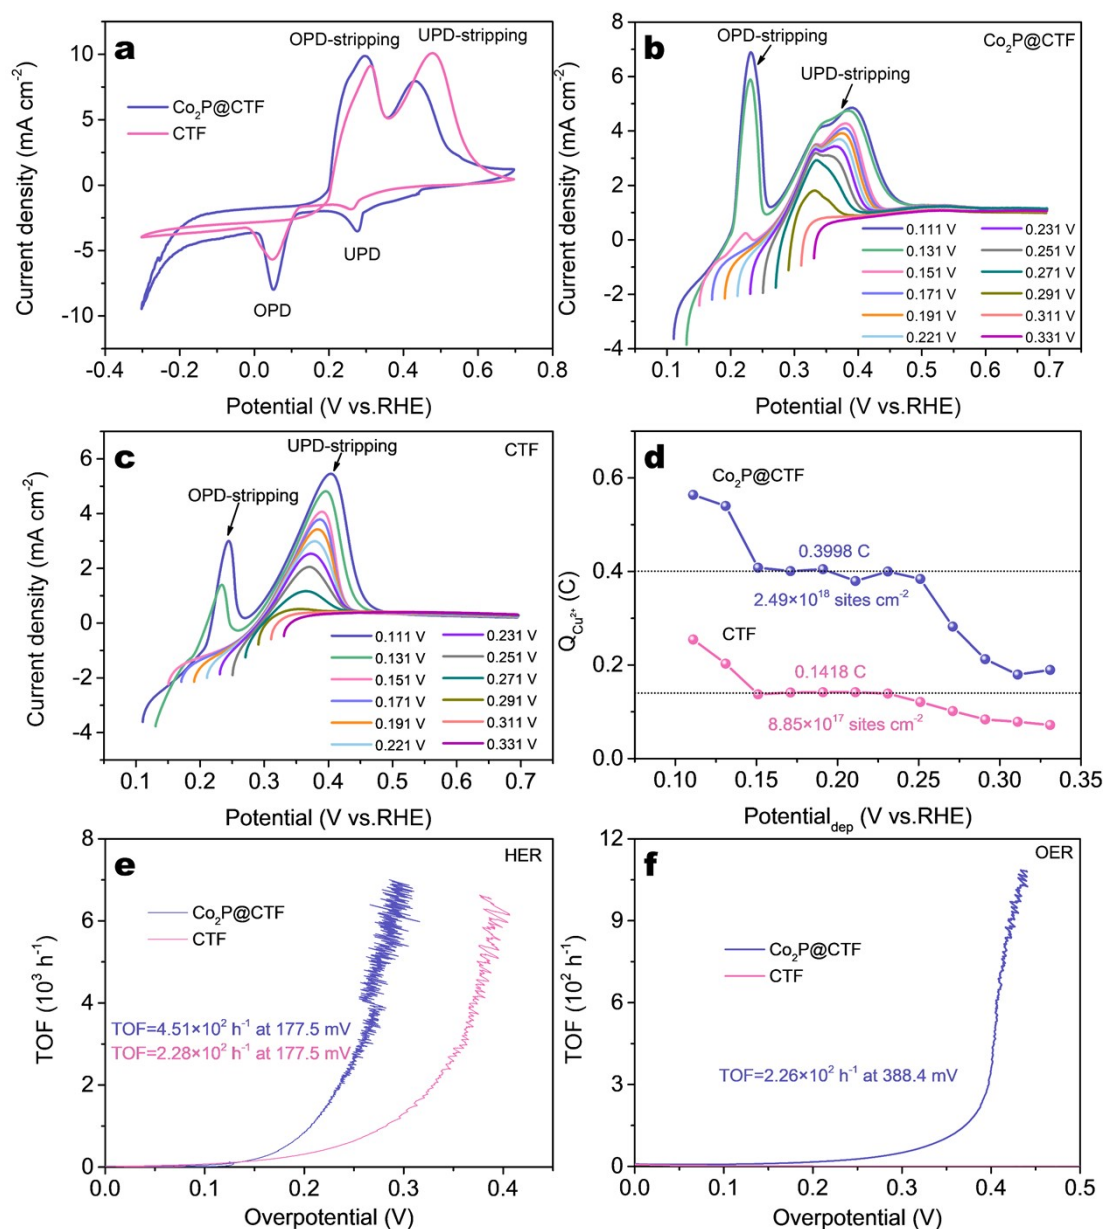

**Fig. S9** (a) CV curves for Co<sub>2</sub>P@CTF and CTF electrodes in a solution of 0.5 M H<sub>2</sub>SO<sub>4</sub>+20 mM CuSO<sub>4</sub>+60 mM NaCl at a scan rate of 1 mV s<sup>-1</sup>. LSV curves of (b) Co<sub>2</sub>P@CTF and (c) CTF electrodes for the stripping of Cu deposited at different overpotentials from -0.111 to 0.331 V vs. RHE in a 0.5 M H<sub>2</sub>SO<sub>4</sub>+20 mM CuSO<sub>4</sub>+60 mM NaCl solution (scan rate of 1 mV s<sup>-1</sup>). (d) The charges required to strip the Cu deposited at different underpotentials for Co<sub>2</sub>P@CTF and CTF electrodes. The dependence of TOF on overpotential for the (e) HER and (f) OER over the Co<sub>2</sub>P@CTF and CTF electrodes.

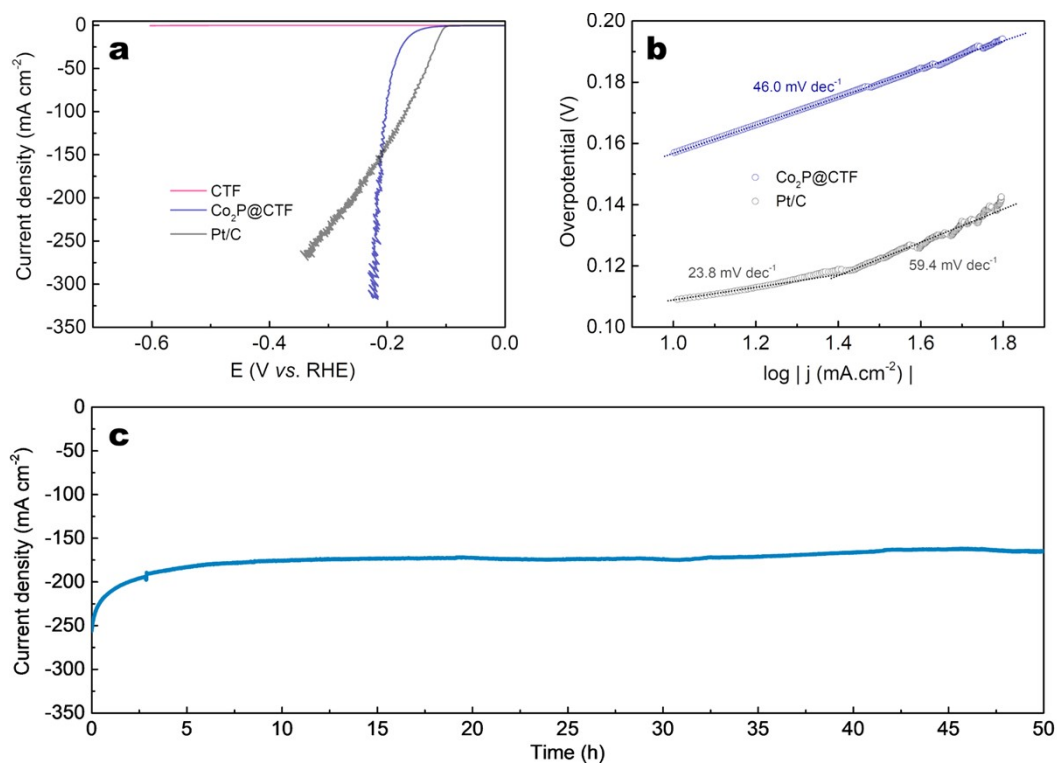

**Fig. S10** (a) HER polarization curves of CTF, Co<sub>2</sub>P@CTF, and Pt/C in 0.5 M H<sub>2</sub>SO<sub>4</sub> at a scan rate of 0.5 mV s<sup>-1</sup>. (b) Tafel plots of CTF, Co<sub>2</sub>P@CTF, and Pt/C. (c) Long-term stability test of Co<sub>2</sub>P@CTF electrode for HER in 0.5 M H<sub>2</sub>SO<sub>4</sub>.



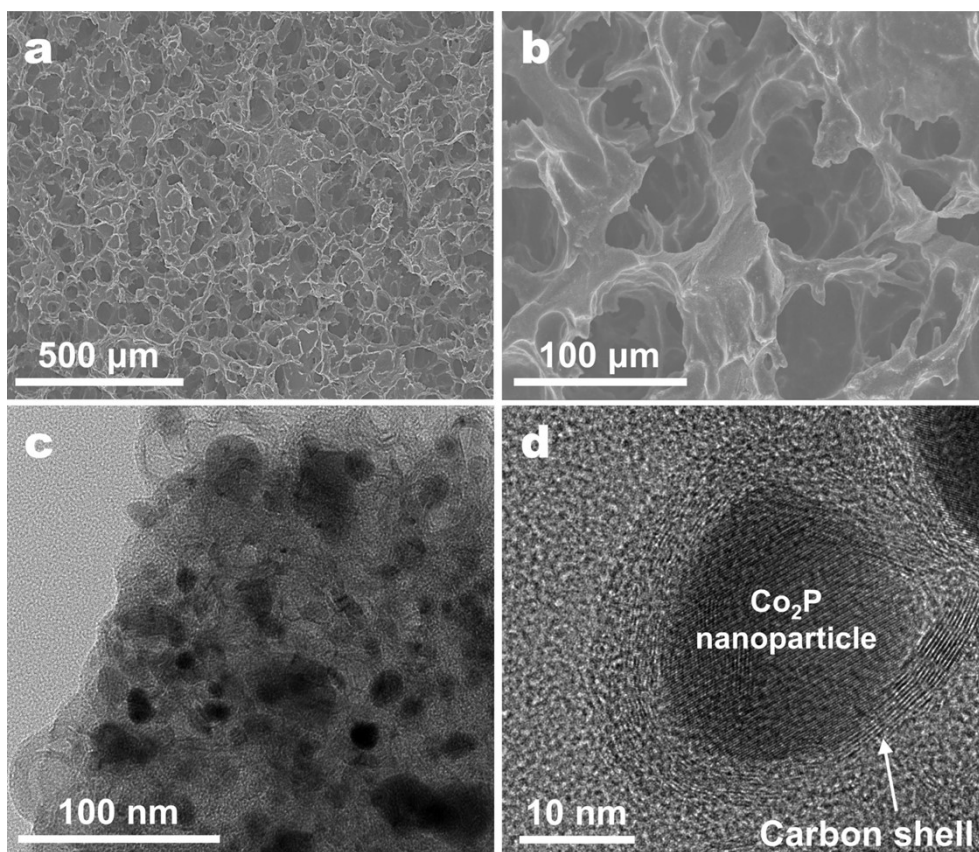

**Fig. S11** (a and b) SEM and (c and d) TEM images of Co<sub>2</sub>P@CTF electrode after HER stability test in 1.0 M KOH solution.

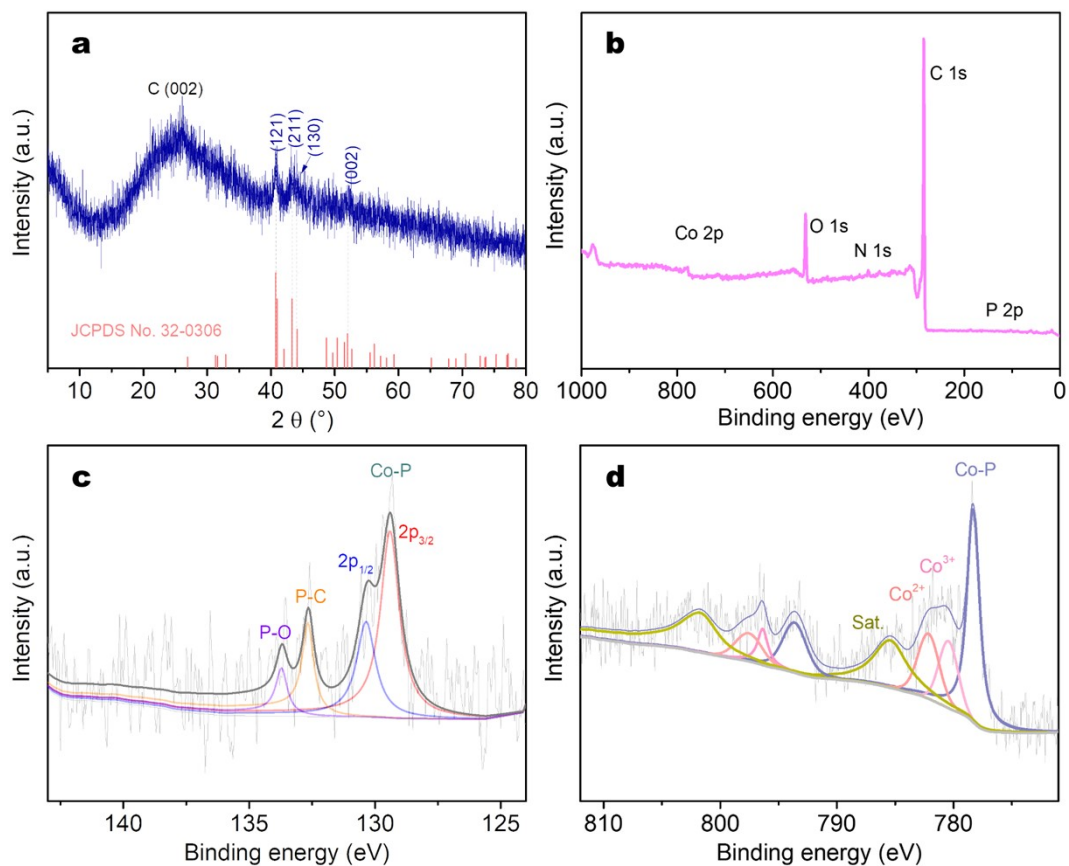

**Fig. S12** (a) XRD pattern and (b) XPS survey spectrum, (c) P 2p, and (d) Co 2p XPS spectra of  $\text{Co}_2\text{P}@$ CTF electrode after HER stability test in 1.0 M KOH solution.

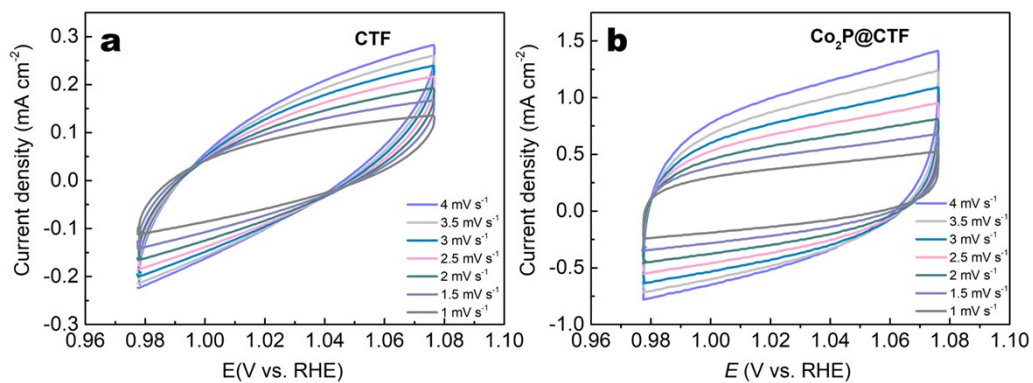

**Fig. S13** CV curves of (a) CTF and (b)  $\text{Co}_2\text{P}@$ CTF electrode measured at the nonfaradaic potential region of 0.98 to 1.08 V vs. RHE over the scan rate from 1 to 4  $\text{mV s}^{-1}$ .

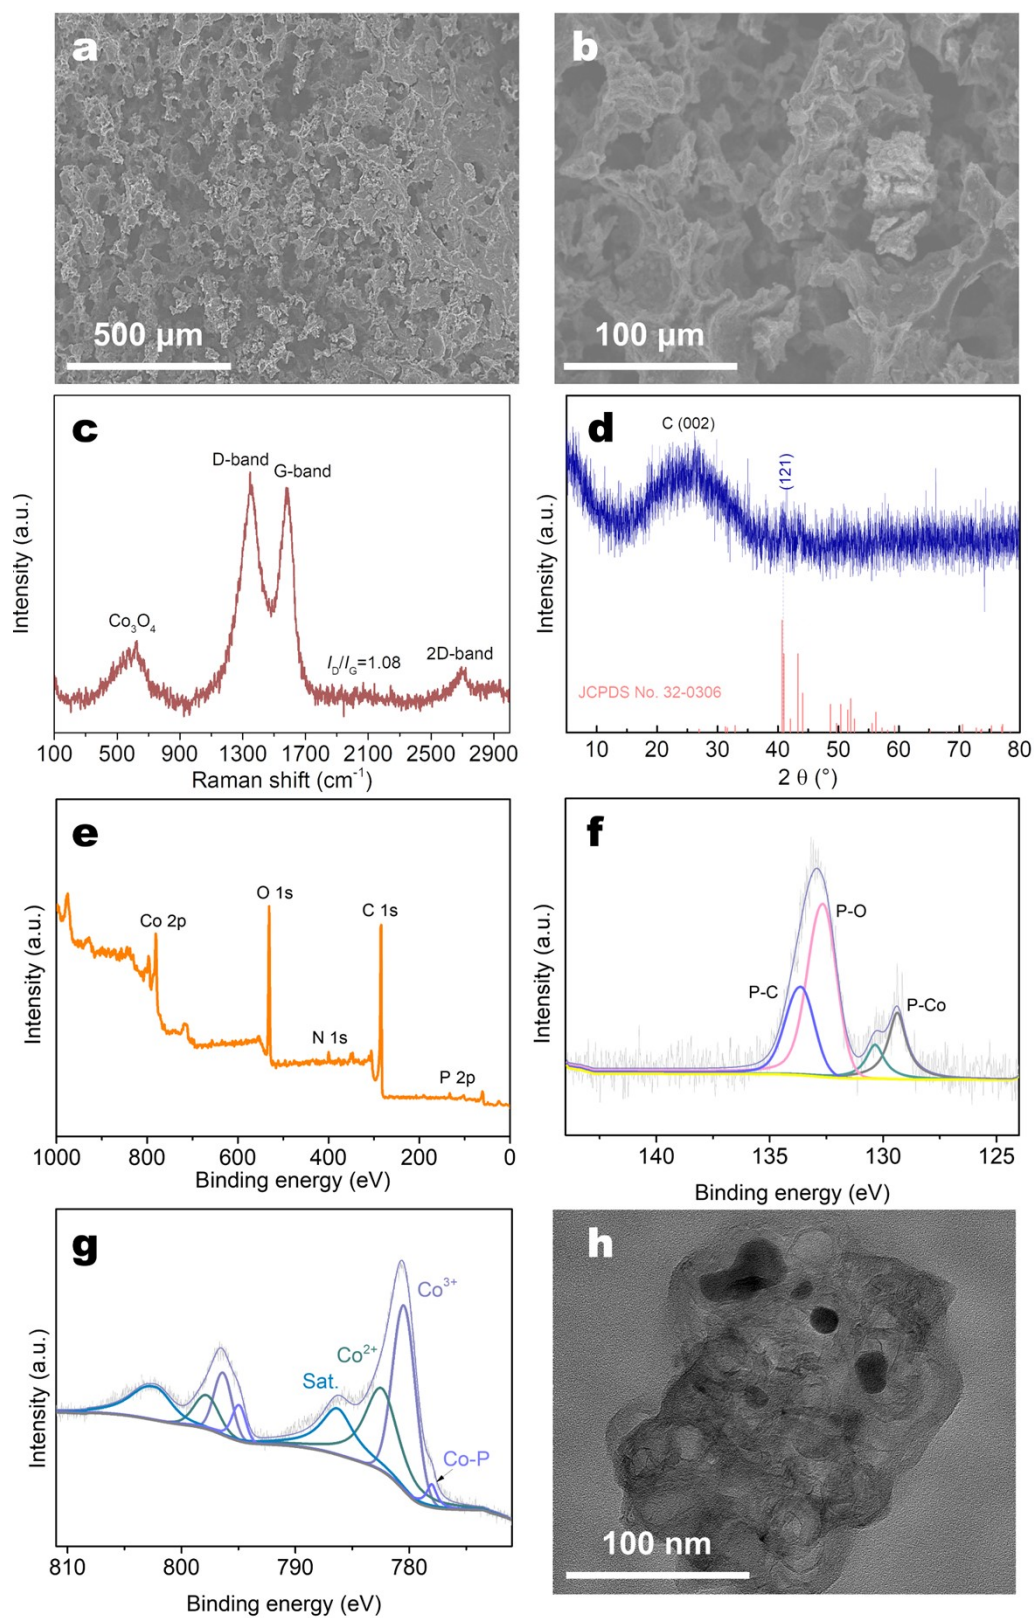

**Fig. S14** (a and b) SEM images, (c) Raman spectrum, (d) XRD pattern, (e) XPS survey spectrum, (f) P 2p, (g) Co 2p XPS spectra, and (h) TEM image of  $\text{Co}_2\text{P}@\text{CTF}$  electrode after OER stability test in 1.0 M KOH solution.

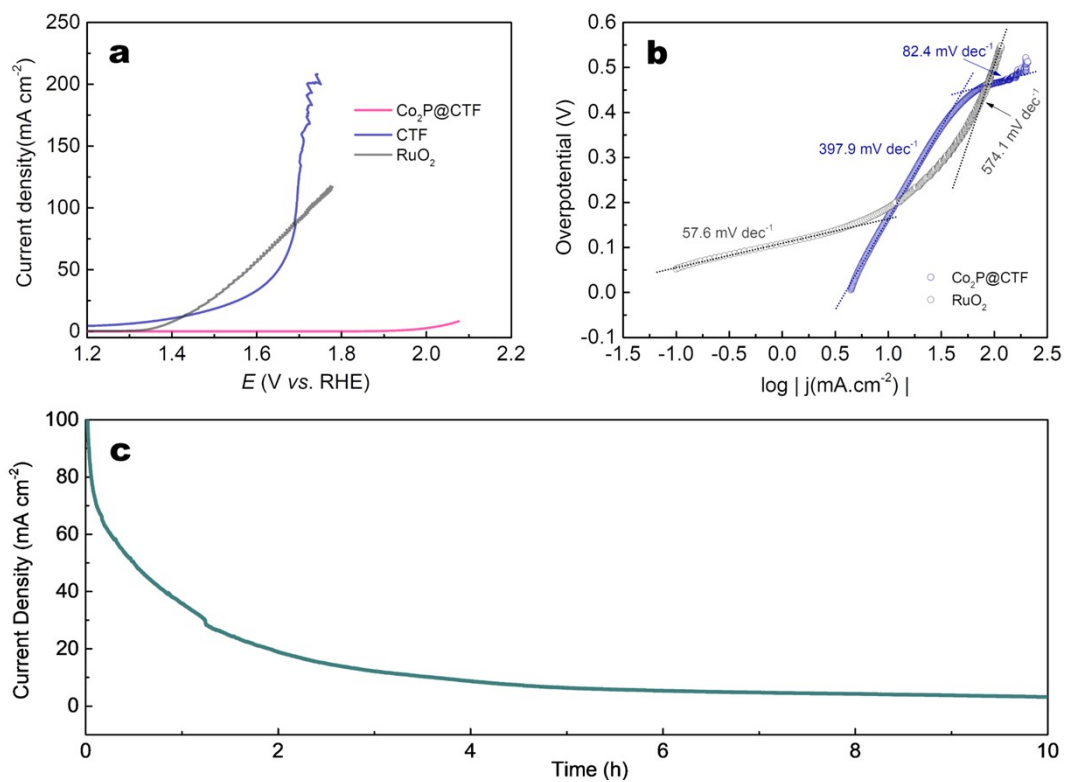

**Fig. S15** (a) OER polarization curves of CTF, Co<sub>2</sub>P@CTF, and Pt/C in 0.5 M H<sub>2</sub>SO<sub>4</sub> at a scan rate of 0.5 mV s<sup>-1</sup>. (b) Tafel plots of CTF, Co<sub>2</sub>P@CTF, and Pt/C. (c) Long-term stability test of Co<sub>2</sub>P@CTF electrode for OER in 0.5 M H<sub>2</sub>SO<sub>4</sub>.



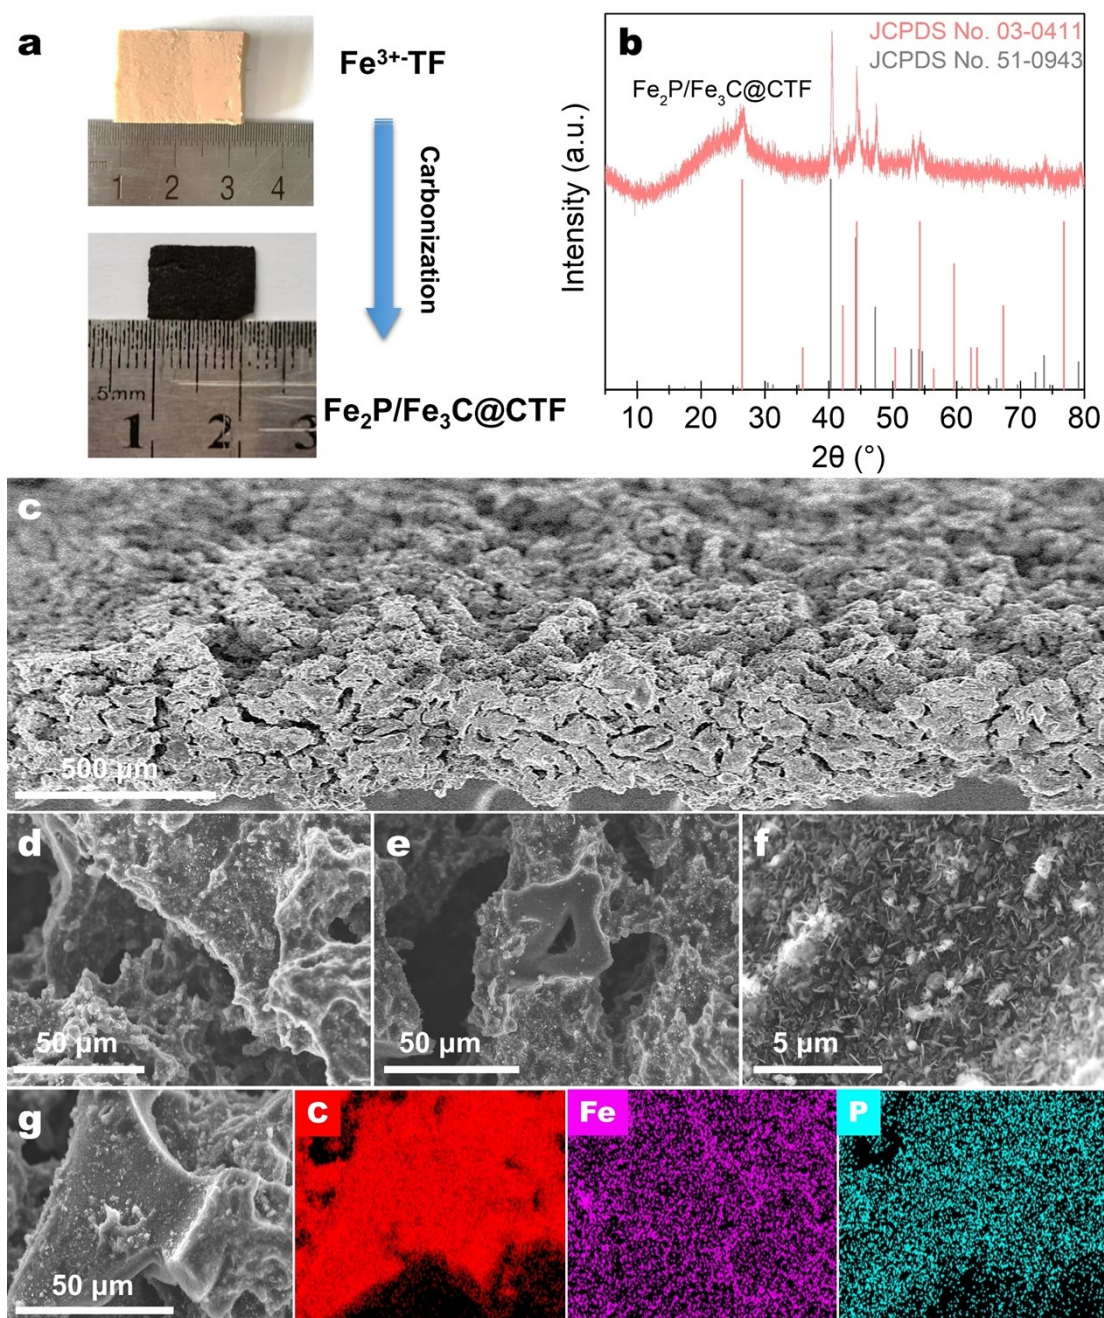

**Fig. S16** (a) Photograph and (b) XRD pattern of monolithic  $\text{Fe}_2\text{P}/\text{Fe}_3\text{C}@CTF$  electrode. (c) SEM image showing the overall view of  $\text{Fe}_2\text{P}/\text{Fe}_3\text{C}@CTF$  electrode. (d) Top-view and (e) side-view SEM images of  $\text{Fe}_2\text{P}/\text{Fe}_3\text{C}@CTF$  electrode. (f) SEM image of  $\text{Fe}_2\text{P}/\text{Fe}_3\text{C}@CTF$  electrode demonstrating the uniform distribution of irregular  $\text{Fe}_2\text{P}/\text{Fe}_3\text{C}$  particles within carbon membrane matrix. (g) SEM image of  $\text{Fe}_2\text{P}/\text{Fe}_3\text{C}@CTF$  electrode and the corresponding EDX elemental mapping images (C, Fe, and P).

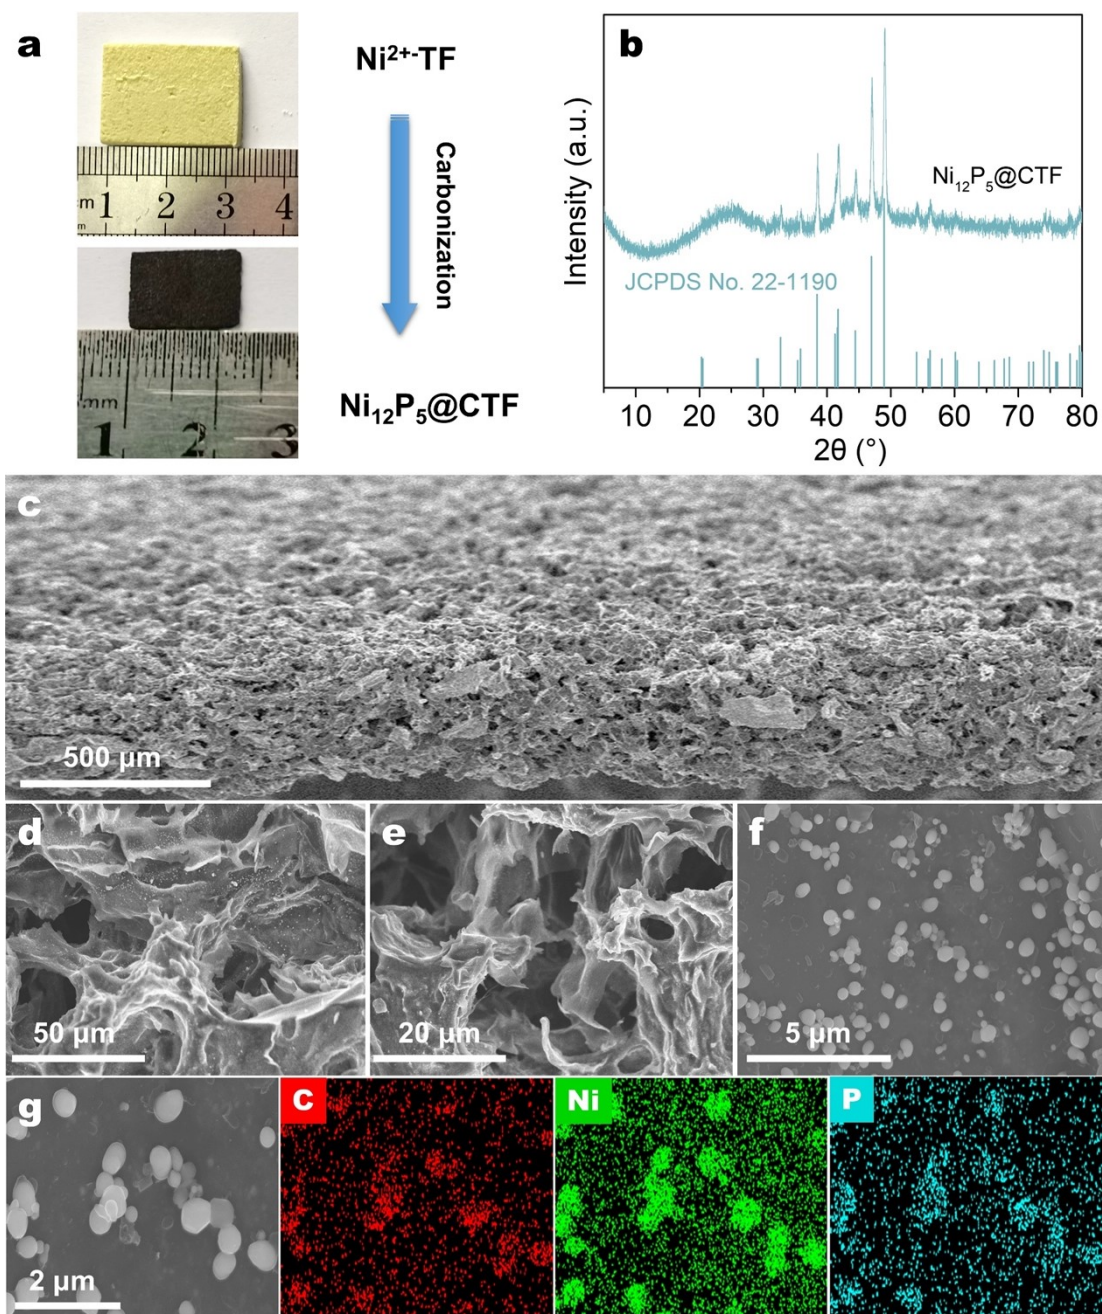

**Fig. S17** (a) Photograph and (b) XRD pattern of monolithic  $\text{Ni}_{12}\text{P}_5@CTF$  electrode. (c) SEM image showing the overall view of  $\text{Ni}_{12}\text{P}_5@CTF$  electrode. (d) Top-view and (e) side-view SEM images of  $\text{Ni}_{12}\text{P}_5@CTF$  electrode. (f) SEM image of  $\text{Ni}_{12}\text{P}_5@CTF$  electrode showing the uniform distribution of  $\text{Ni}_{12}\text{P}_5$  particles ( $\sim 500$  nm) within carbon membrane matrix. (g) SEM image of  $\text{Ni}_{12}\text{P}_5@CTF$  electrode and the corresponding EDX elemental mapping images (C, Ni, and P).



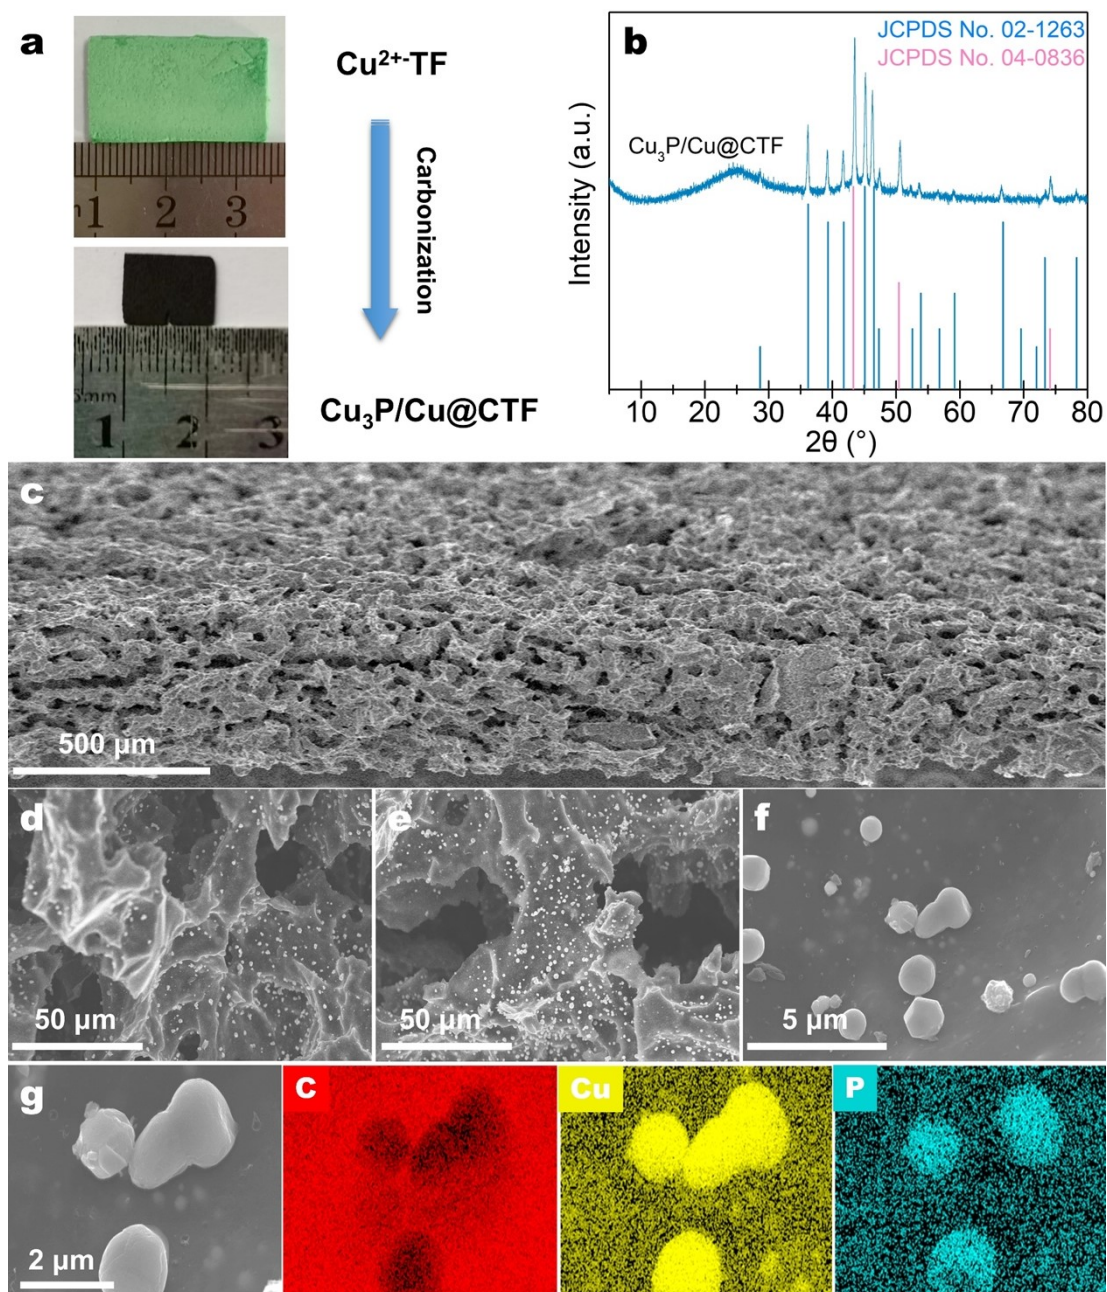

**Fig. S18** (a) Photograph and (b) XRD pattern of monolithic  $\text{Cu}_3\text{P/Cu@CTF}$  electrode. (c) SEM image showing the overall view of  $\text{Cu}_3\text{P/Cu@CTF}$  electrode. (d) Top-view and (e) side-view SEM images of  $\text{Cu}_3\text{P/Cu@CTF}$  electrode. (f) SEM image of  $\text{Cu}_3\text{P/Cu@CTF}$  electrode showing the presence of large  $\text{Cu}_3\text{P/Cu}$  particles ( $\sim 1 \mu\text{m}$ ) on carbon membrane matrix. (g) SEM image of  $\text{Cu}_3\text{P/Cu@CTF}$  electrode and the corresponding EDX elemental mapping images (C, Cu, and P).

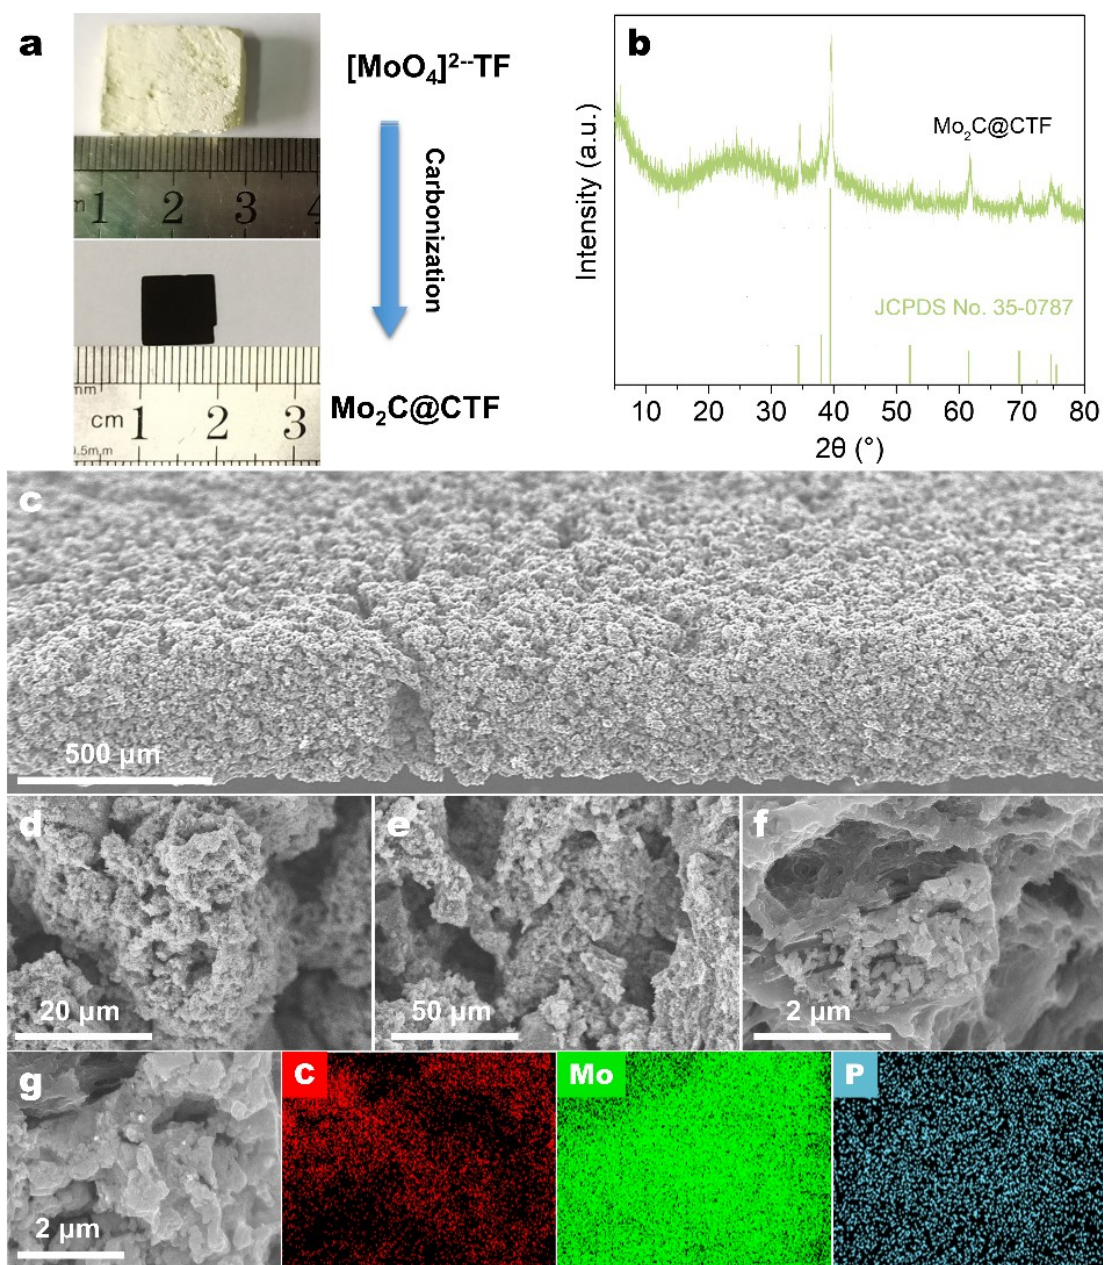

**Fig. S19** (a) Photograph and (b) XRD pattern of monolithic  $\text{Mo}_2\text{C}@CTF$  electrode. (c) SEM image showing the overall view of  $\text{Mo}_2\text{C}@CTF$  electrode. (d) Top-view and (e) side-view SEM images of  $\text{Mo}_2\text{C}@CTF$  electrode. (f) High-resolution SEM image of  $\text{Mo}_2\text{C}@CTF$  electrode. (g) SEM image of  $\text{Mo}_2\text{C}@CTF$  electrode and the corresponding EDX elemental mapping images (C, Mo, and P).



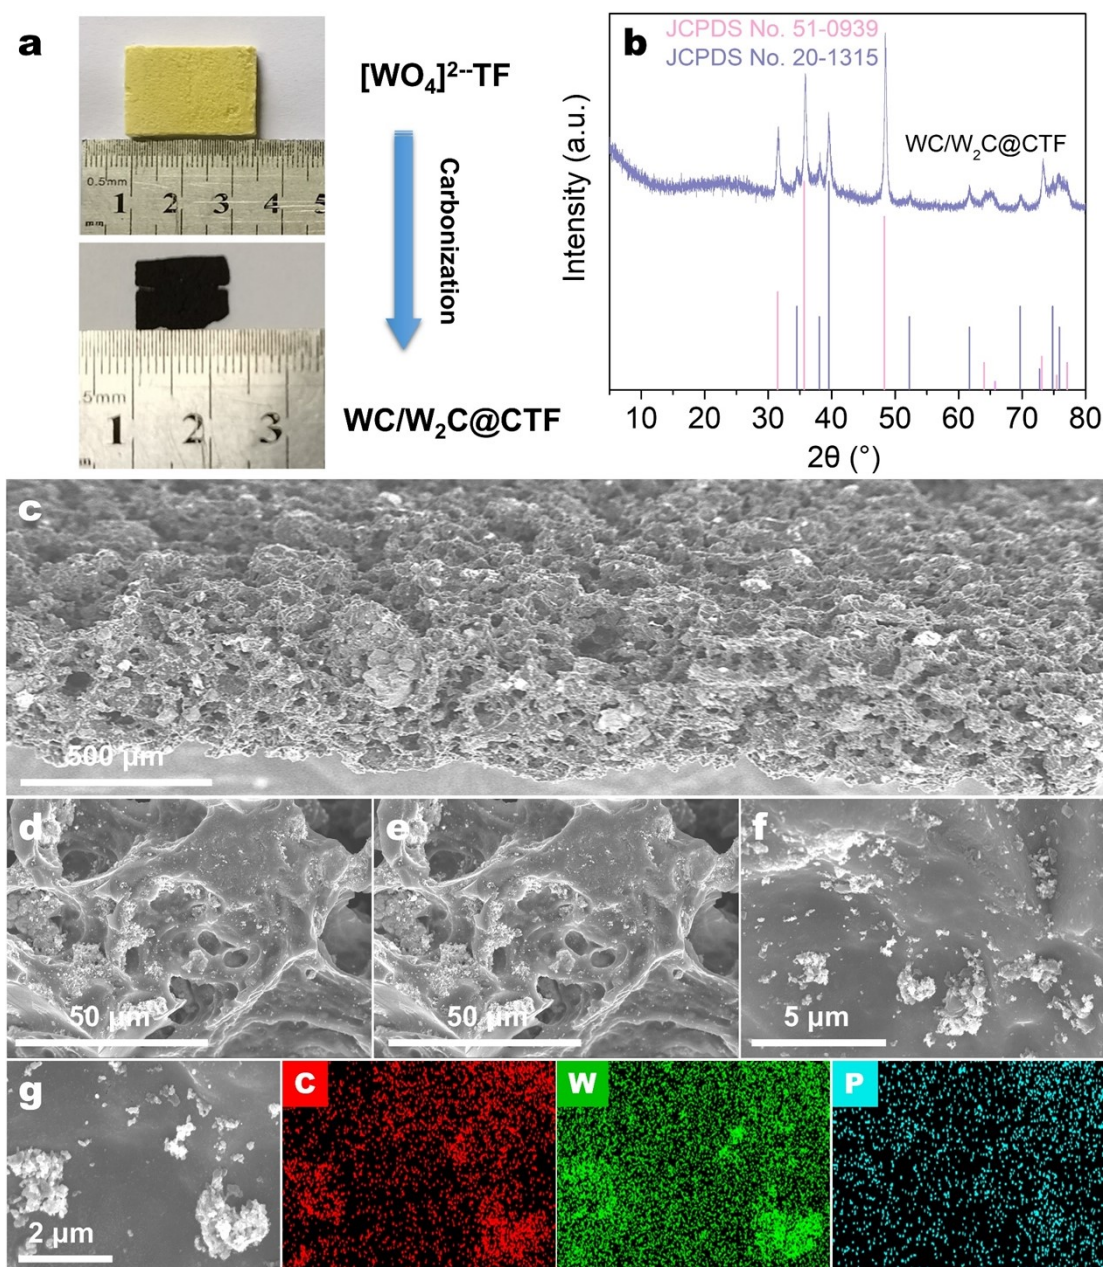

**Fig. S20** (a) Photograph and (b) XRD pattern of monolithic WC/W<sub>2</sub>C@CTF electrode. (c) SEM image showing the overall view of WC/W<sub>2</sub>C@CTF electrode. (d) Top-view and (e) side-view SEM images of WC/W<sub>2</sub>C@CTF electrode. (f) High-resolution SEM image of WC/W<sub>2</sub>C@CTF electrode showing the presence of aggregated WC/W<sub>2</sub>C particles. (g) SEM image of WC/W<sub>2</sub>C and the corresponding EDX elemental mapping images (C, W, and P).

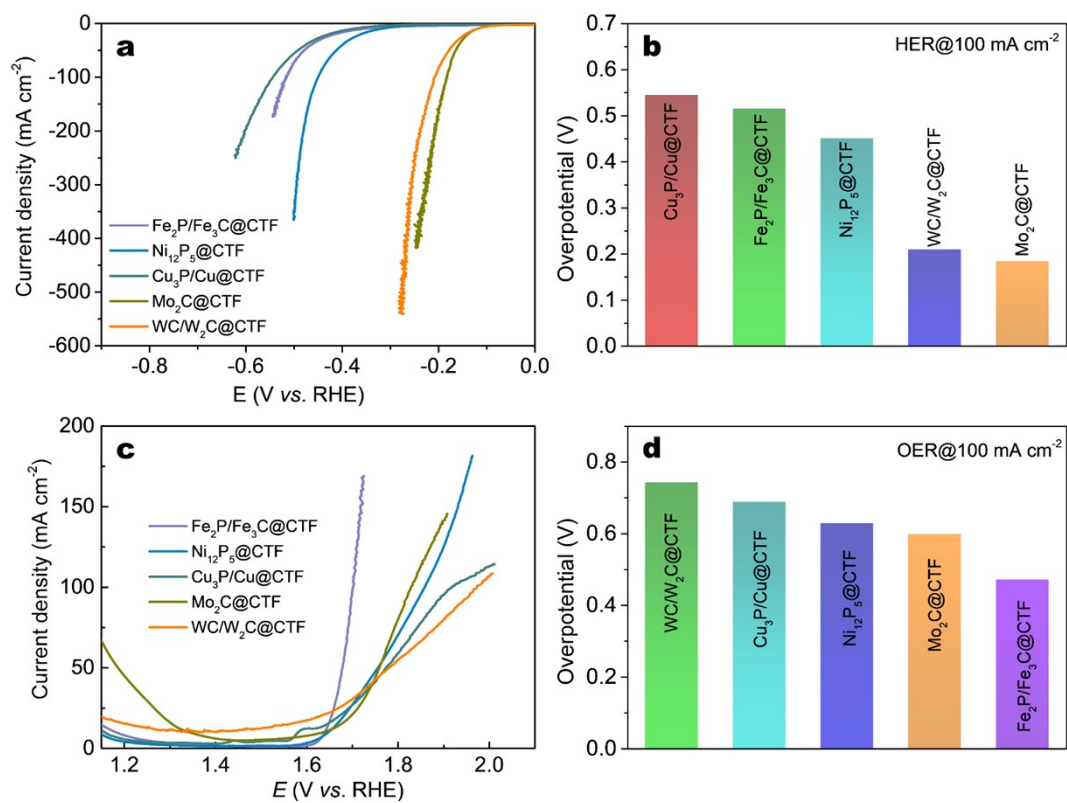

**Fig. S21** (a) HER polarization curves and (b) the overpotentials at 100 mA cm<sup>-2</sup> for monolithic carbon-based electrodes in 1.0 M KOH solution. (c) OER polarization curves and (d) the overpotentials at 100 mA cm<sup>-2</sup> for monolithic carbon-based electrodes in 1.0 M KOH solution.
